# Supplementary material for: Dodenuclear [MnIII8LnIII4] clusters with 2-(hydroxymethyl)pyridine: syntheses, structures, and magnetic properties
Source: Royal Society of Chemistry journal article supplement (doi:10.1039/c5dt03130c), 2015-01-01
Supplement: c5dt03130c1.pdf [file c5dt03130c1.pdf]

## Supporting Information

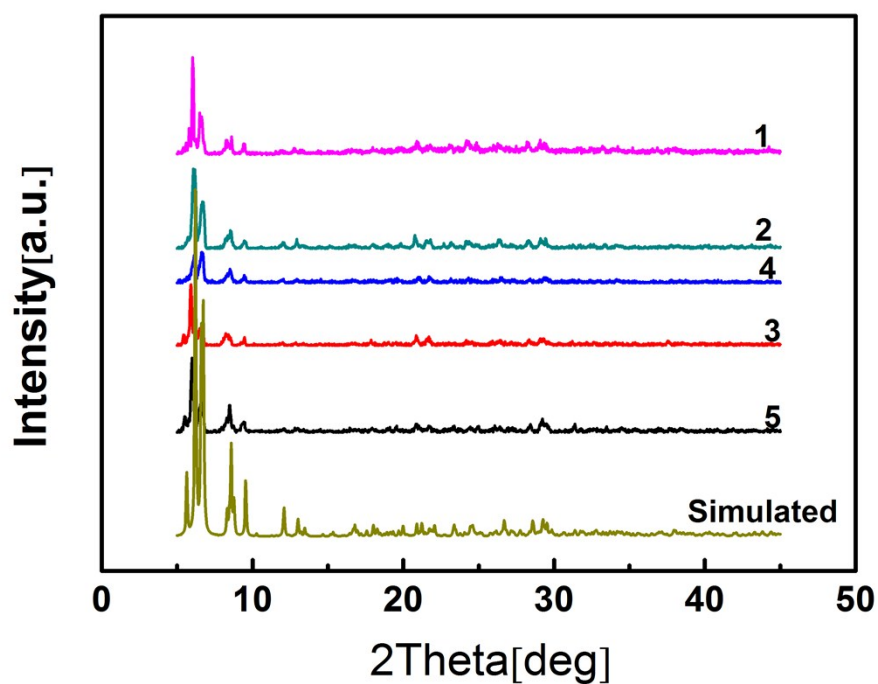

Figure S1. The simulated XRPD pattern and the experimental patterns for complexes 1-5.

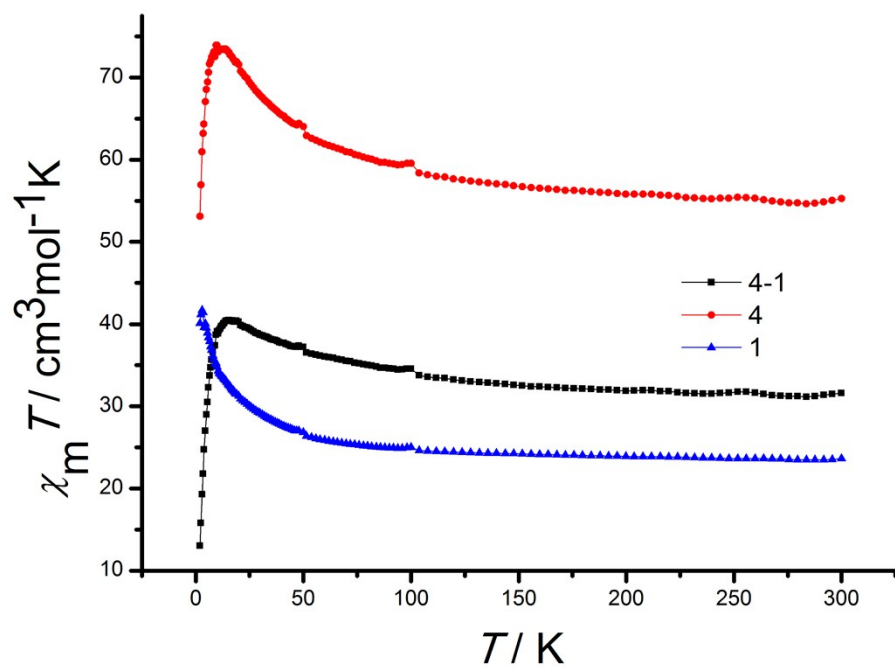

Figure S2. The ‘subtracted’  $\chi_m T$  versus  $T$  plots at 0.1 T for complex 4.

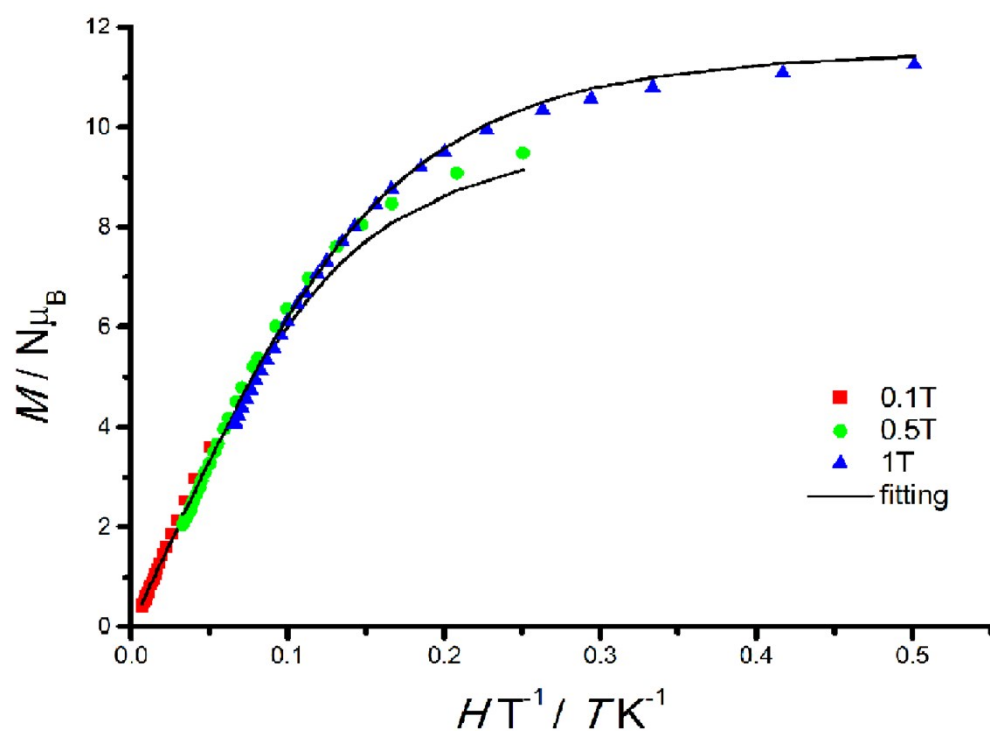

Figure S3. Plots of  $M$  vs.  $H/T$  for complex 1 at the indicated applied field.

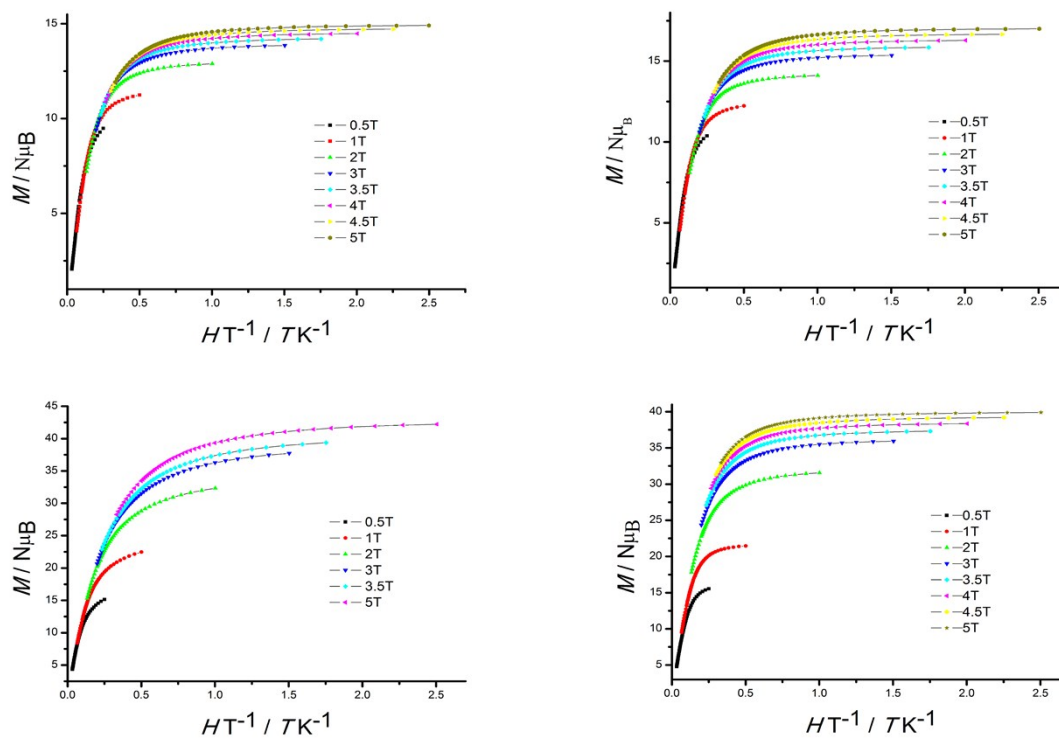

Figure S4. Plots of  $M/N\mu_B$  vs  $H/T$  for complexes 1 (upleft), 2 (upright), 4 (left bottom) and 5 (right bottom). at the indicated applied fields. Solid lines are eye guides.

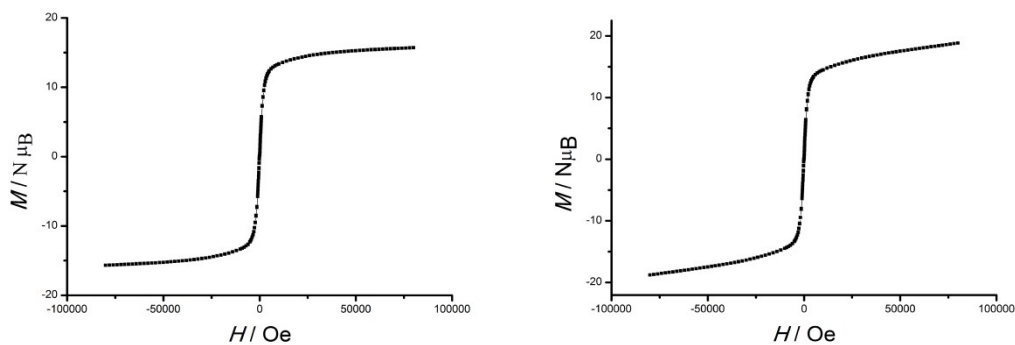

Figure S5. Plots of  $M / N\mu_B$  vs  $H$  for complexes 1 (left) and 2 (right) at 2 K.

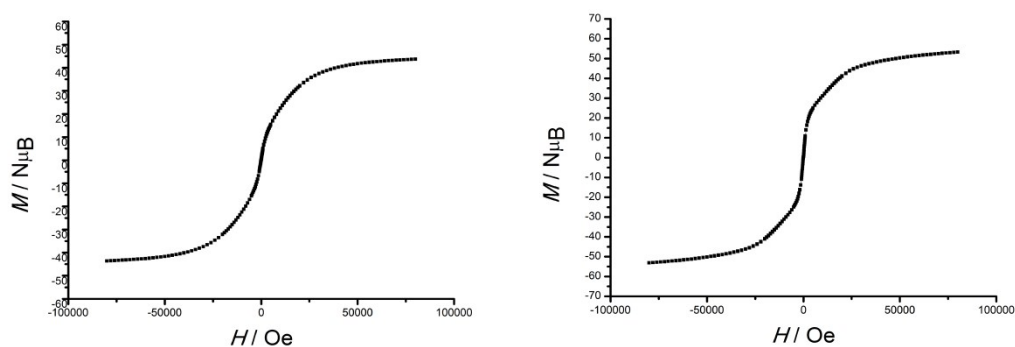

Figure S6. Plots of  $M / N\mu_B$  vs  $H$  for complexes 3 (left) and 4 (right) at 2K.

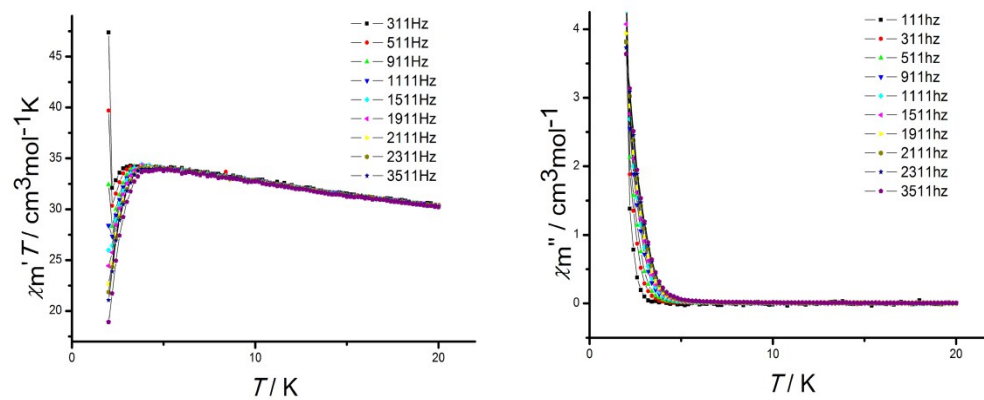

Figure S7. ( left ) In-phase  $\chi'_m T$  and (right) out-of-phase  $\chi''_m$  ac susceptibility signals of complex 1 in a 3.0 G field oscillating.

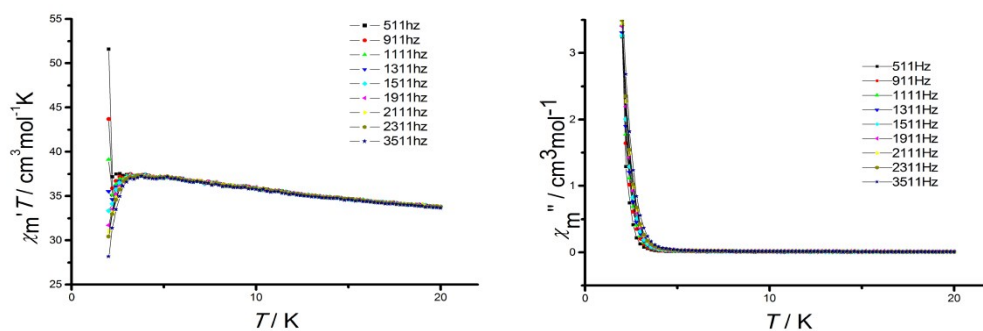

Figure S8. ( left ) In-phase  $\chi'_m T$  and (right) out-of-phase  $\chi''_m$  ac susceptibility signals of complex 2 in a 3.0 G field oscillating.

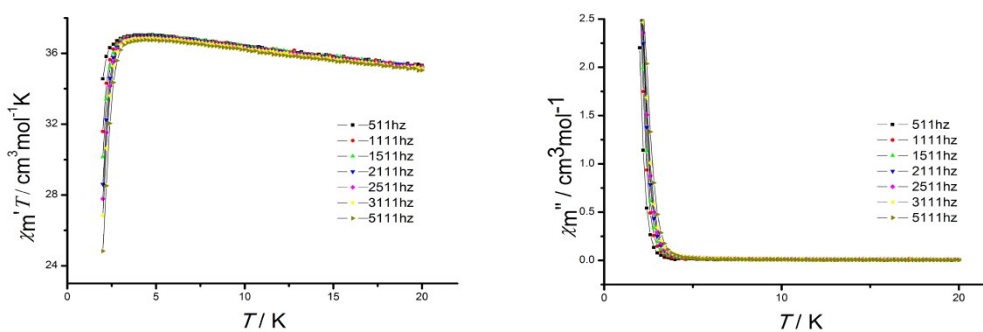

Figure S9. ( left ) In-phase  $\chi'_m T$  and (right) out-of-phase  $\chi''_m$  ac susceptibility signals of complex 3 in a 3.0 G field oscillating.

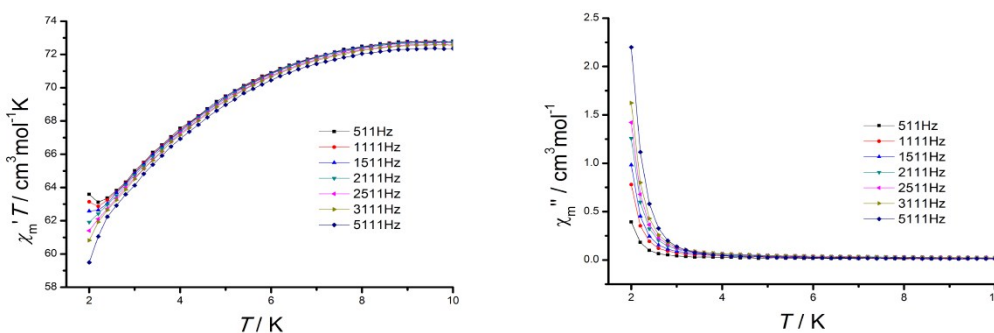

Figure S10. ( left ) In-phase  $\chi'_m T$  and (right) out-of-phase  $-\chi''_m$  ac susceptibility signals of complex 4 in a 3.0 G field oscillating

Table 1. Bond-valence sums for the Mn atoms of complex 4.

| Atom | Mn <sup>2+</sup> | Mn <sup>3+</sup> | Mn <sup>4+</sup> |
|------|------------------|------------------|------------------|
| Mn1  | 3.30             | 3.04             |                  |
| Mn2  | 3.27             | 3.02             |                  |
| Mn3  | 3.85             | 3.55             | 3.48             |
| Mn4  | 3.13             | 2.86             |                  |

Table 2. Bond-valence sums for the O atoms of complex 4.

| Atom | BVS  | Assignment |
|------|------|------------|
| O11  | 1.76 | $\mu_4$ -O |
| O16  | 2.16 | $\mu_3$ -O |
| O17  | 2.15 | $\mu_3$ -O |
| O20  | 2.00 | $\mu_4$ -O |

Table 3. Selected bond lengths (Å) and angles (deg) for complex 1

|             |          |                   |            |                    |            |
|-------------|----------|-------------------|------------|--------------------|------------|
| La(1)-O(5)  | 2.447(7) | Mn(3)-O(8)        | 2.092(4)   | O(18)-Mn(1)-Mn(4)  | 116.82(11) |
| La(1)-O(2)  | 2.445(8) | Mn(3)-O(10)       | 2.114(5)   | O(16)-Mn(1)-Mn(4)  | 41.43(13)  |
| La(1)-O(17) | 2.472(4) | Mn(4)-O(12)       | 1.890(4)   | O(9)#1-Mn(1)-Mn(2) | 83.75(12)  |
| La(1)-O(26) | 2.484(5) | Mn(4)-O(13)       | 1.942(5)   | O(17)-Mn(1)-Mn(2)  | 99.20(13)  |
| La(2)-O(25) | 2.480(4) | Mn(4)-O(14)       | 1.956(4)   | O(25)-Mn(1)-Mn(2)  | 32.42(13)  |
| La(2)-O(4)  | 2.515(6) | O(2)-La(1)-Mn(1)  | 76.90(16)  | O(26)-Mn(2)-Mn(4)  | 143.61(16) |
| La(2)-O(7)  | 2.587(4) | O(17)-La(1)-Mn(1) | 30.63(10)  | O(17)-Mn(1)-Mn(2)  | 99.20(13)  |
| La(2)-O(18) | 2.654(4) | O(26)-La(1)-Mn(1) | 80.16(10)  | O(25)-Mn(1)-Mn(2)  | 32.42(13)  |
| Mn(1)-O(18) | 2.217(4) | O(25)-La(2)-Mn(2) | 28.34(9)   | O(26)-Mn(2)-Mn(4)  | 143.61(16) |
| Mn(1)-O(16) | 2.357(5) | O(4)-La(2)-Mn(2)  | 99.51(19)  | O(12)-Mn(2)-Mn(4)  | 33.16(12)  |
| Mn(2)-O(26) | 1.870(4) | O(7)-La(2)-Mn(2)  | 37.09(9)   | O(12)-Mn(3)-Mn(4)  | 37.93(11)  |
| Mn(2)-O(12) | 1.873(4) | O(18)-La(2)-Mn(2) | 88.34(9)   | O(11)-Mn(3)-Mn(4)  | 42.39(13)  |
| Mn(3)-O(9)  | 1.890(4) | O(1)-La(2)-Mn(1)  | 99.0(2)    | O(12)-Mn(4)-Mn(3)  | 37.97(13)  |
| Mn(3)-O(12) | 1.892(4) | O(3)-La(2)-Mn(1)  | 107.74(11) | O(13)-Mn(4)-Mn(3)  | 98.93(16)  |
| Mn(3)-O(11) | 2.030(4) | O(6)-La(2)-Mn(1)  | 147.19(11) |                    |            |

Table 4. Selected bond lengths (Å) and angles (deg) for complex 2

|                 |           |                   |            |                   |            |
|-----------------|-----------|-------------------|------------|-------------------|------------|
| Pr(1)-O(13)     | 2.371(6)  | Mn(2)-O(16)       | 1.874(4)   | O(9)-Pr(2)-O(6)   | 75.68(15)  |
| Pr(1)-O(2)      | 2.409(8)  | Mn(2)-O(17)       | 1.884(4)   | O(9)-Pr(2)-O(10)  | 74.29(15)  |
| Pr(1)-O(2')     | 2.411(15) | Mn(2)-O(26)       | 1.886(4)   | O(6)-Pr(2)-O(10)  | 76.27(14)  |
| Pr(1)-O(17)     | 2.427(4)  | Mn(2)-N(4)        | 2.030(5)   | O(9)-Pr(2)-O(12)  | 72.2(2)    |
| Pr(1)-O(1)      | 2.442(4)  | Mn(2)-O(15)       | 2.200(4)   | O(9)-Pr(2)-Mn(1)  | 146.99(11) |
| Pr(1)-O(26)     | 2.523(4)  | Mn(3)-O(11)#1     | 1.894(4)   | O(6)-Pr(2)-Mn(1)  | 107.97(11) |
| Pr(1)-O(25)     | 2.555(5)  | Mn(3)-O(8)#1      | 1.937(5)   | O(10)-Pr(2)-Mn(1) | 74.88(10)  |
| Pr(1)-O(23)     | 2.590(5)  | Mn(3)-O(7)#1      | 1.949(4)   | O(12)-Pr(2)-Mn(1) | 130.08(17) |
| Pr(2)-O(10)     | 2.424(4)  | Mn(3)-O(10)#1     | 2.018(4)   | O(26)-Pr(2)-Mn(1) | 28.81(9)   |
| Pr(2)-O(12)     | 2.429(6)  | Mn(4)-O(16)       | 1.882(4)   | O(9)-Pr(2)-Mn(2)  | 108.03(11) |
| Pr(2)-O(26)     | 2.445(4)  | Mn(4)-O(11)       | 1.889(4)   | O(6)-Pr(2)-Mn(2)  | 148.41(11) |
| Pr(2)-O(3)      | 2.480(6)  | Mn(4)-O(10)       | 2.054(4)   | O(10)-Pr(2)-Mn(2) | 74.83(9)   |
| Pr(2)-O(4)      | 2.563(4)  | O(13)-Pr(1)-O(17) | 79.18(19)  | O(12)-Pr(2)-Mn(2) | 97.32(15)  |
| Mn(1)-O(1)      | 1.871(4)  | O(2)-Pr(1)-O(17)  | 147.1(3)   | O(9)-Pr(2)-Pr(1)  | 140.81(12) |
| Mn(1)-O(11)#1   | 1.872(4)  | O(2')-Pr(1)-O(17) | 126.5(4)   | O(6)-Pr(2)-Pr(1)  | 139.59(11) |
| Mn(1)-O(26)     | 1.900(4)  | O(13)-Pr(1)-O(1)  | 137.1(2)   | O(10)-Pr(2)-Pr(1) | 122.17(10) |
| O(17)-Mn(2)-Mn1 | 98.97(12) | O(17)-Mn(2)-O(18) | 100.46(17) | O(16)-Mn(2)-Mn(3) | 33.78(12)  |
| O(26)-Mn(2)-Mn1 | 32.99(12) | O(16)-Mn(2)-O(18) | 75.27(16)  | O(16)-Mn(2)-Mn(1) | 83.69(11)  |

Table 5. Selected bond lengths (Å) and angles (deg) for complex 3

|               |          |                     |            |                     |            |
|---------------|----------|---------------------|------------|---------------------|------------|
| Nd(1)-O(7)    | 2.404(5) | Nd(1)-O(1)          | 2.418(5)   | O(16)-Nd(2)-O(22)   | 73.00(14)  |
| Nd(1)-O(12)   | 2.407(4) | Nd(2)-O(15)         | 2.413(4)   | O(15)-Nd(2)-O(20)   | 70.19(14)  |
| Nd(1)-O(23)   | 2.416(4) | Nd(2)-O(16)         | 2.423(4)   | O(16)-Nd(2)-O(20)   | 74.87(15)  |
| Nd(2)-O(4)#1  | 2.390(8) | Nd(2)-O(26)#1       | 2.508(4)   | O(11)-Mn(1)-O(23)   | 104.44(18) |
| Mn(1)-O(8)    | 1.934(5) | O(7)-Nd(1)-O(12)    | 75.60(16)  | O(24)-Mn(1)-O(13)   | 81.78(18)  |
| Mn(1)-O(11)   | 1.953(4) | O(7)-Nd(1)-O(23)    | 74.45(15)  | O(8)-Mn(1)-Mn(2)    | 149.06(15) |
| Mn(1)-O(23)   | 2.023(4) | O(12)-Nd(1)-O(23)   | 76.55(14)  | O(11)-Mn(1)-Mn(2)   | 98.48(15)  |
| Mn(1)-O(13)   | 2.102(5) | O(7)-Nd(1)-O(1)     | 72.3(2)    | O(23)-Mn(1)-Mn(2)   | 43.56(12)  |
| Mn(2)-O(24)   | 1.878(4) | O(7)-Nd(1)-Mn(3)#1  | 147.10(11) | O(8)-Mn(1)-Mn(4)    | 141.15(15) |
| Mn(2)-O(25)   | 1.884(4) | O(12)-Nd(1)-Mn(3)#1 | 108.19(11) | O(11)-Mn(1)-Mn(4)   | 95.33(14)  |
| Mn(2)-O(23)#1 | 2.050(4) | O(23)-Nd(1)-Mn(3)#1 | 74.84(10)  | O(23)-Mn(1)-Mn(4)   | 110.95(12) |
| Mn(2)-O(23)   | 2.060(4) | O(1)-Nd(1)-Mn(3)#1  | 129.91(18) | O(24)-Mn(2)-O(23)   | 80.39(16)  |
| Mn(2)-O(9)    | 2.101(4) | O(12)-Nd(1)-Mn(4)#1 | 148.72(11) | O(25)-Mn(2)-O(23)   | 94.29(17)  |
| Mn(3)-O(16)   | 1.869(4) | O(23)-Nd(1)-Mn(4)#1 | 74.76(10)  | O(10)#1-Mn(3)-Mn(1) | 115.10(11) |
| Mn(3)-O(25)#1 | 1.876(4) | O(1)-Nd(1)-Mn(4)#1  | 97.23(15)  | O(13)-Mn(3)-Mn(1)   | 41.88(13)  |
| Mn(3)-O(26)#1 | 1.903(4) | O(7)-Nd(1)-Nd(2)#1  | 140.76(11) | O(16)-Mn(3)-Mn(4)   | 98.86(13)  |
| Mn(4)-O(24)   | 1.875(4) | O(12)-Nd(1)-Nd(2)#1 | 139.67(11) | O(25)#1-Mn(3)-Mn(4) | 83.77(12)  |
| Mn(4)-O(26)#1 | 1.884(4) | O(23)-Nd(1)-Nd(2)#1 | 121.93(10) | O(13)-Mn(3)-Nd(2)   | 89.74(12)  |
| Mn(4)-O(15)   | 1.886(4) | O(15)-Nd(2)-O(22)   | 119.50(16) | O(15)-Mn(4)-Mn(3)   | 99.05(12)  |

Table 6. Selected bond lengths (Å) and angles (deg) for complex 5

|               |          |                   |            |                   |            |
|---------------|----------|-------------------|------------|-------------------|------------|
| Dy(1)-O(3)    | 2.270(5) | Mn(4)-O(15)       | 1.883(4)   | O(4)-Dy(2)-Mn(1)  | 121.65(13) |
| Dy(1)-O(1)    | 2.282(5) | Mn(4)-O(12)#1     | 1.892(4)   | O(5)-Dy(2)-Mn(1)  | 151.95(10) |
| Dy(1)-O(20)   | 2.342(4) | Mn(4)-O(8)#1      | 1.923(4)   | O(15)-Mn(1)-O(20) | 171.05(18) |
| Dy(1)-O(18)   | 2.363(4) | Mn(4)-O(6)#1      | 1.947(4)   | O(15)-Mn(1)-O(19) | 100.08(16) |
| Dy(1)-O(19)   | 2.451(3) | O(3)-Dy(1)-O(1)   | 81.5(2)    | O(20)-Mn(1)-O(19) | 86.31(16)  |
| Dy(2)-O(11)   | 2.318(4) | O(3)-Dy(1)-O(20)  | 147.02(17) | O(20)-Mn(1)-Mn(4) | 141.99(13) |
| Dy(2)-O(7)    | 2.339(4) | O(1)-Dy(1)-O(20)  | 79.55(19)  | O(19)-Mn(1)-Mn(4) | 88.67(11)  |
| Dy(2)-O(2)    | 2.339(5) | O(3)-Dy(1)-O(18)  | 75.83(17)  | O(15)-Mn(1)-Mn(3) | 83.61(12)  |
| Dy(2)-O(4)    | 2.342(5) | O(1)-Dy(1)-O(18)  | 140.93(18) | O(20)-Mn(1)-Mn(3) | 98.68(12)  |
| Dy(2)-O(5)    | 2.353(6) | O(3)-Dy(1)-Mn(1)  | 117.86(14) | O(9)-Mn(1)-Dy(1)  | 93.08(11)  |
| Mn(1)-O(15)   | 2.345(4) | O(1)-Dy(1)-Mn(1)  | 80.53(15)  | O(16)-Mn(1)-Dy(1) | 89.12(18)  |
| Mn(1)-O(20)   | 1.880(4) | O(20)-Dy(1)-Mn(1) | 32.13(9)   | O(15)-Mn(1)-Dy(2) | 84.42(12)  |
| Mn(1)-O(19)   | 1.882(4) | O(18)-Dy(1)-Mn(1) | 82.52(10)  | O(20)-Mn(1)-Dy(2) | 104.37(13) |
| Mn(2)-O(15)   | 1.890(4) | O(19)-Dy(1)-Mn(1) | 32.99(9)   | O(15)-Mn(2)-O(12) | 172.22(17) |
| Mn(2)-O(12)   | 1.875(4) | O(23)-Dy(1)-Mn(1) | 136.05(10) | O(15)-Mn(2)-O(11) | 93.58(16)  |
| Mn(2)-O(11)   | 1.875(4) | O(11)-Dy(2)-O(7)  | 76.96(15)  | O(13)-Mn(2)-Mn(4) | 94.76(12)  |
| Mn(2)-O(11)#1 | 2.040(4) | O(11)-Dy(2)-O(2)  | 142.22(17) | O(10)-Mn(2)-Mn(4) | 132.20(12) |
| Mn(2)-O(13)   | 2.069(4) | O(7)-Dy(2)-O(2)   | 71.88(17)  | Mn(1)-Mn(3)-Dy(1) | 62.12(2)   |
| Mn(3)-O(18)   | 2.086(4) | O(7)-Dy(2)-Mn(3)  | 150.16(11) | Mn(4)-Mn(3)-Dy(1) | 120.85(3)  |
| Mn(3)-O(12)#1 | 1.871(4) | O(2)-Dy(2)-Mn(3)  | 94.09(13)  | O(18)-Mn(3)-Dy(2) | 104.47(13) |
| Mn(3)-O(19)   | 1.886(4) | O(4)-Dy(2)-Mn(3)  | 92.05(12)  | O(16)-Mn(4)-Mn(2) | 116.74(15) |
| Mn(3)-O(16)   | 1.901(4) | O(2)-Dy(2)-Mn(1)  | 126.63(14) | Mn(2)-Mn(4)-Mn(3) | 97.51(3)   |
